# Supplementary material for: Oregano (Origanum vulgare) Essential Oil and Its Constituents Prevent Rat Kidney Tissue Injury and Inflammation Induced by a High Dose of L-Arginine
Source: MDPI journal article supplement (doi:10.3390/ijms25020941), 2024-01-11
Supplement: s1 [file s1]

**Table S1.** Chemical composition of *O. minutiflorum* essential oil

| RI <sup>a</sup> | RI <sup>b</sup> | Constituent <sup>c</sup>                             | Content <sup>d</sup> | Class <sup>e</sup> |
|-----------------|-----------------|------------------------------------------------------|----------------------|--------------------|
| 785             | 776             | Methyl 2-methylbutanoate                             | 0.1                  | O                  |
| 929             | 924             | $\alpha$ -Thujene                                    | 0.6                  | M                  |
| 937             | 932             | $\alpha$ -Pinene <sup>f</sup>                        | 0.5                  | M                  |
| 954             | 946             | Camphene <sup>f</sup>                                | 0.2                  | M                  |
| 977             | 974             | 1-Octen-3-ol <sup>f</sup>                            | 0.1                  | O                  |
| 983             | 974             | $\beta$ -Pinene <sup>f</sup>                         | 0.2                  | M                  |
| 992             | 988             | Myrcene <sup>f</sup>                                 | 0.7                  | M                  |
| 995             | 988             | 3-Octanol <sup>f</sup>                               | Tr <sup>h</sup>      | O                  |
| 1009            | 1002            | $\alpha$ -Phellandrene <sup>f</sup>                  | 0.1                  | M                  |
| 1015            | 1008            | $\Delta^3$ -Carene                                   | tr                   | M                  |
| 1020            | 1014            | $\alpha$ -Terpinene <sup>f</sup>                     | 0.8                  | M                  |
| 1028            | 1020            | <i>p</i> -Cymene <sup>f</sup>                        | 3.9                  | M                  |
| 1032            | 1024            | Limonene <sup>f</sup>                                | 0.3                  | M                  |
| 1032            | 1025            | $\beta$ -Phellandrene <sup>f</sup>                   | tr                   | M                  |
| 1035            | 1026            | 1,8-Cineole <sup>f</sup>                             | 0.3                  | MO                 |
| 1037            | 1032            | ( <i>Z</i> )- $\beta$ -Ocimene                       | tr                   | M                  |
| 1048            | 1044            | ( <i>E</i> )- $\beta$ -Ocimene                       | tr                   | M                  |
| 1061            | 1054            | $\gamma$ -Terpinene <sup>f</sup>                     | 3.1                  | M                  |
| 1070            | 1065            | <i>cis</i> -Sabinene hydrate                         | 0.5                  | MO                 |
| 1075            | 1067            | <i>cis</i> -Linalool oxide (furanoid) <sup>f</sup>   | 0.2                  | MO                 |
| 1092            | 1084            | <i>trans</i> -Linalool oxide (furanoid) <sup>f</sup> | 0.3                  | MO                 |
| 1102            | 1095            | Linalool <sup>f</sup>                                | 33.1                 | MO                 |
| 1098            | 1107            | <i>trans</i> -Sabinene hydrate                       | tr                   | MO                 |
| 1126            | 1118            | <i>cis-p</i> -Menth-2-en-1-ol                        | tr                   | MO                 |
| 1143            | 1136            | <i>trans-p</i> -Menth-2-en-1-ol                      | tr                   | MO                 |
| 1150            | 1141            | Camphor <sup>f</sup>                                 | tr                   | MO                 |
| 1171            | 1165            | Borneol <sup>f</sup>                                 | 0.6                  | MO                 |
| 1176            | 1173            | <i>trans</i> -Linalool oxide (pyranoid)              | tr                   | MO                 |
| 1182            | 1174            | Terpinen-4-ol <sup>f</sup>                           | 0.4                  | MO                 |
| 1189            | 1179            | <i>p</i> -Cymen-8-ol                                 | tr                   | MO                 |
| 1195            | 1186            | $\alpha$ -Terpineol <sup>f</sup>                     | 0.4                  | MO                 |
| 1200            | 1191            | <i>cis</i> -Dihydro carvone                          | tr                   | MO                 |
| 1210            | 1200            | <i>trans</i> -Dihydro carvone                        | tr                   | MO                 |
| 1246            | 1241            | <i>O</i> -Methyl carvacrol <sup>f</sup>              | 0.2                  | MO                 |
| 1250            | 1239            | Carvone <sup>f</sup>                                 | 0.1                  | MO                 |
| 1284            | 1277            | 2,6-Dimethyl-1,7-octadiene-3,6-diol <sup>g</sup>     | tr                   | MO                 |
| 1287            | 1289            | Isothymol                                            | tr                   | MO                 |
| 1294            | 1289            | Thymol <sup>f</sup>                                  | 2.5                  | MO                 |
| 1298            | 1307            | Carvacrol <sup>f</sup>                               | 46.9                 | MO                 |
| 1375            | 1370            | Carvacryl acetate                                    | 0.1                  | MO                 |
| 1391            | 1387            | $\beta$ -Bourbonene                                  | tr                   | S                  |
| 1426            | 1417            | ( <i>E</i> )-Caryophyllene <sup>f</sup>              | 1.9                  | S                  |
| 1435            | 1430            | $\beta$ -Copaene                                     | tr                   | S                  |
| 1446            | 1439            | Aromadendrene <sup>f</sup>                           | 0.3                  | S                  |
| 1460            | 1452            | $\alpha$ -Humulene <sup>f</sup>                      | 0.1                  | S                  |
| 1468            | 1464            | 9- <i>epi</i> -( <i>E</i> )-Caryophyllene            | tr                   | S                  |
| 1482            | 1483            | $\alpha$ -Amorphene                                  | tr                   | S                  |
| 1501            | 1496            | Viridiflorene                                        | tr                   | S                  |
| 1503            | 1500            | Bicyclogermacrene                                    | tr                   | S                  |

|                                |      |                                    |             |    |
|--------------------------------|------|------------------------------------|-------------|----|
| 1512                           | 1505 | $\beta$ -Bisabolene <sup>f</sup>   | 0.3         | S  |
| 1520                           | 1513 | $\gamma$ -Cadinene                 | tr          | S  |
| 1529                           | 1522 | $\delta$ -Cadinene                 | tr          | S  |
| 1554                           | 1548 | Elemol                             | tr          | SO |
| 1584                           | 1577 | Spathulenol <sup>f</sup>           | tr          | SO |
| 1590                           | 1582 | Caryophyllene oxide <sup>f</sup>   | 0.3         | SO |
| 1647                           | 1638 | $\tau$ -Cadinol                    | 0.1         | SO |
| 1658                           | 1649 | $\beta$ -Eudesmol                  | tr          | SO |
| 1661                           | 1662 | 7- <i>epi</i> - $\alpha$ -Eudesmol | tr          | SO |
| <b>Total identified (%)</b>    |      |                                    | <b>99.2</b> |    |
| Monoterpene hydrocarbons (M)   |      |                                    | 10.4        |    |
| Oxygenated monoterpenes (MO)   |      |                                    | 85.6        |    |
| Sesquiterpene hydrocarbons (S) |      |                                    | 2.6         |    |
| Oxygenated sesquiterpenes (SO) |      |                                    | 0.4         |    |
| Others (O)                     |      |                                    | 0.2         |    |

<sup>a</sup> Retention indices determined experimentally on a DB-5MS column relative to a series of C<sub>7</sub>–C<sub>40</sub> *n*-alkanes. <sup>b</sup> Literature values of retention indices taken from Adams [1] or NIST [2] collection. <sup>c</sup> Compound identified based on mass spectra and retention indices matching with literature data. <sup>d</sup> Values are means of three individual analyses. <sup>e</sup> For compound class abbreviations, *cf.* last rows of this Table. <sup>f</sup> Compound identity confirmed by a co-injection experiment with a standard. <sup>g</sup> tr, trace amounts (<0.05%). <sup>h</sup> Correct diastereomer not determined.

## References

1. R. P. Adams, 'Identification of Essential Oil Components by Gas Chromatography/Mass Spectrometry 4th ed.; Allured Publishing: Carol Stream, Illinois, USA, 2007.
2. NIST Mass Spectrometry Data Center, William E. Wallace, director, "Retention Indices" in NIST Chemistry WebBook, NIST Standard Reference Database Number 69, Eds. P.J. Linstrom and W.G. Mallard, National Institute of Standards and Technology, Gaithersburg MD, 20899, <https://doi.org/10.18434/T4D303>, (retrieved September 10, 2020).
